# Supplementary material
Source: PubMed Central journal article supplement (PMC5069094)
Supplement: supp_jlb.4VMAB0316-100RR_Supplemental_Figure1.pdf [file supp_jlb.4VMAB0316-100RR_Supplemental_Figure1.pdf]

# Supplemental Figure 1

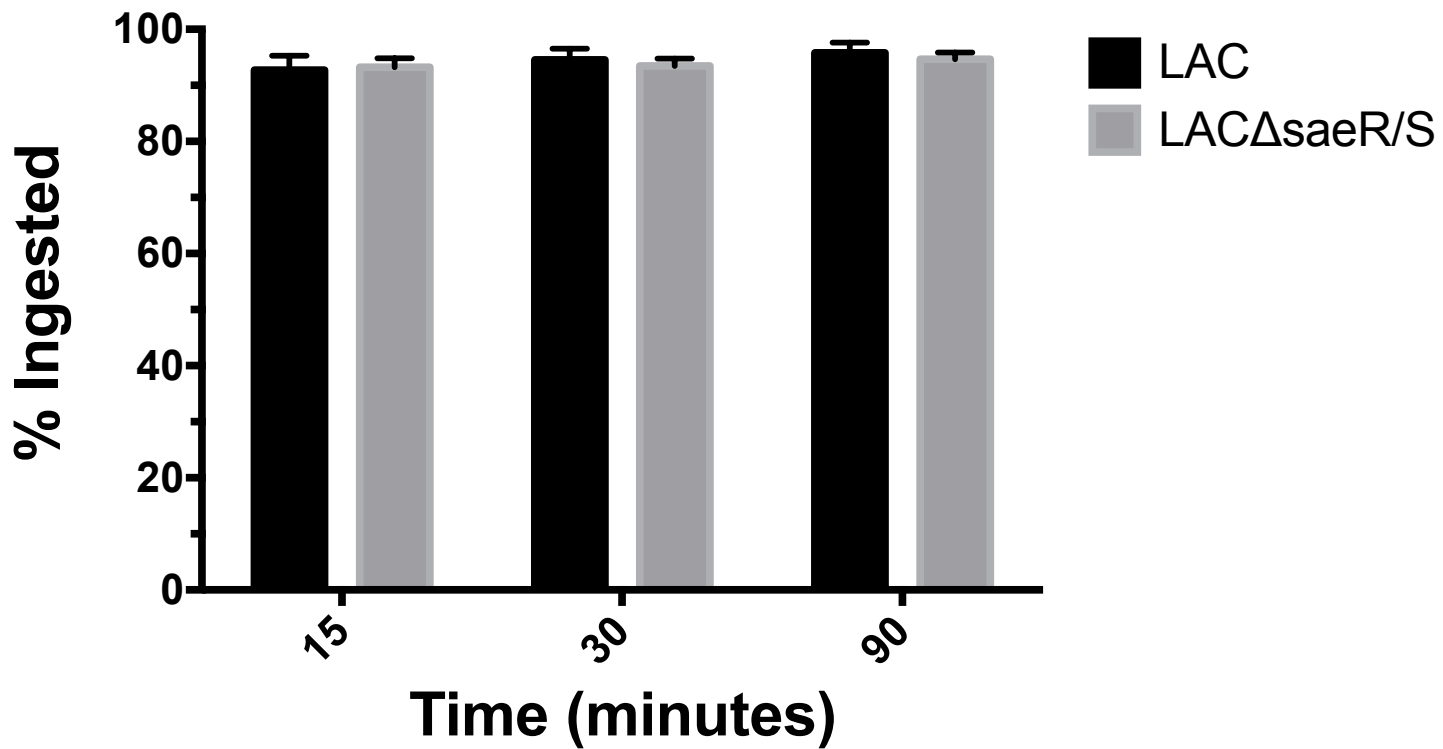

**Figure S1. Phagocytosis by human neutrophils is not influenced by SaeR/S-regulated factors.** Percentage of LAC and LAC*saeR/S* strains ingested by human PMNs was calculated using the equation: [(number of ingested bacteria per cell / total number of PMN-associated bacteria, bound or ingested)\*100]. Results are from 3 separate donors.
