# Supplementary material
Source: PubMed Central journal article supplement (PMC5069094)
Supplement: supp_jlb.4VMAB0316-100RR_Supplemental_Figure2.pdf [file supp_jlb.4VMAB0316-100RR_Supplemental_Figure2.pdf]

Supplemental Figure 2

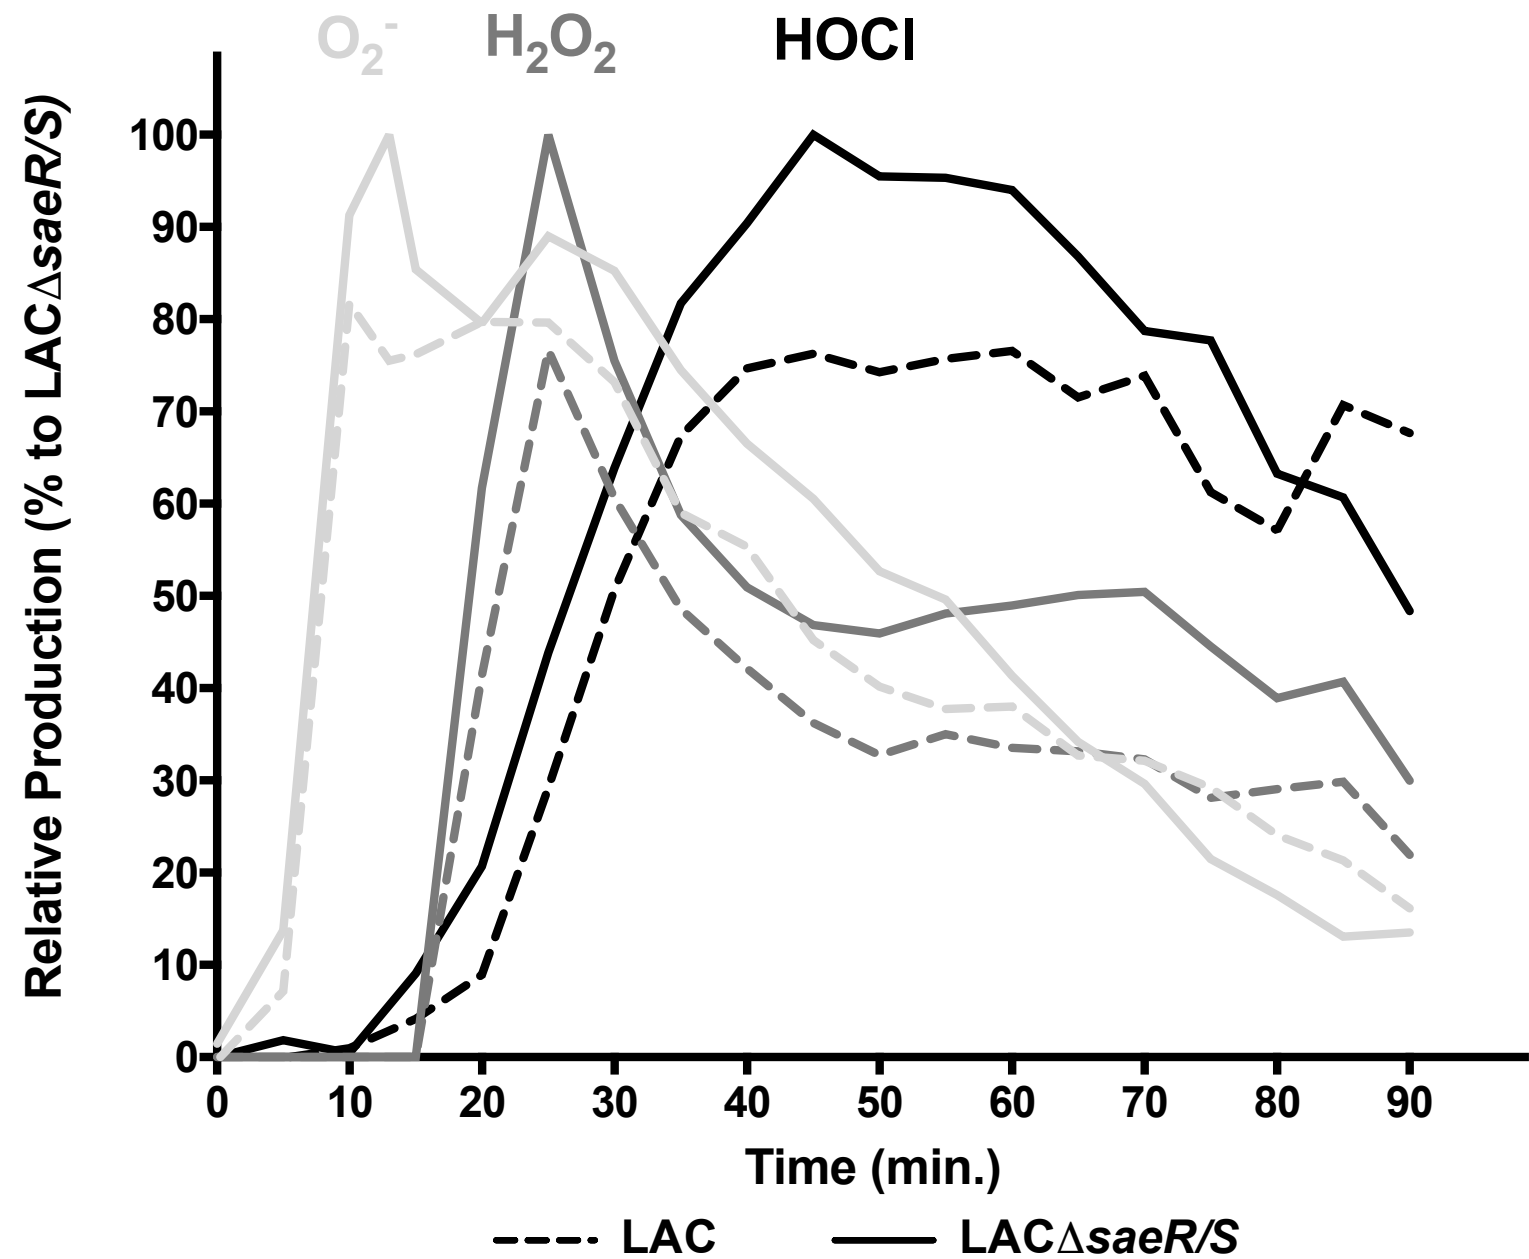

**Figure S2. ROS production by *S. aureus* LAC or LAC $\Delta$ saeR/S during exposure to human neutrophils.** Superoxide ( $O_2^-$ ), hydrogen peroxide ( $H_2O_2$ ) and hypohalous acid (HOCl) production by human neutrophils was measured with luminol, Amplex<sup>®</sup> Red, and R19-S, respectively. Results are shown as the average change over time in 5-minute intervals for each ROS measured and normalized to neutrophils exposed to LAC $\Delta$ saeR/S.
